# Supplementary material for: Sensitivity of the Ross Ice Shelf to environmental and glaciological controls
Source: Copernicus journal article supplement (doi:10.5194/tc-2022-50), 2022-03-03
Supplement: Supplementary file [file tc-2022-50-AC2-supplement.pdf]

# Sensitivity of the Ross Ice Shelf to environmental and glaciological controls -Response to reviewers-

Francesca BALDACCHINO et al

June 08 2022

We would like to thank the two anonymous reviewers and the editor for their positive and constructive comments. We address their remarks below point by point.

## 1 Reviewer #1

Regardless of my concerns, and even though the method and the conclusions of the paper are very similar to Morlighem et al. (2021), I think that the relative novelty of the method and the appropriate comparison/discussion of the results with respect to other studies make the paper interesting and worthy of publication (after revision) and will be useful to the community.

We would like to thank reviewer for their positive review and excellent suggestions. It is true that this work builds on Morlighem et al. (2021). We use a similar methodology here, but instead of focusing on the Amundsen Sea Embayment that has been changing rapidly, we are looking at a large cold ice shelf.

### 1.1 Specific Comments

- The Automatic Differentiation method used is a powerful tool but I would be careful concerning the conclusions about the sensitivity of the model to the ice rigidity change over the ice shelf. Non-linear effect aside, we could expect that a change in rigidity (let's say halving B) in a given area would lead to an important velocity change (about doubling the velocity). If such flow speed on the ice shelf was lasting longer than 20 years, it would eventually lead to a strong increase in flow from grounded ice (as the buttressing effect of the ice shelf would decrease as the ice shelf thins) and potentially subsequent VAF change. I agree that the authors clearly state that the map is the resulting sensitivity for a 20-year simulation but I think that, if you agree with my comment, it would be great to emphasize this in discussion/conclusions (similarly to what you have said for upstream ice at line 125).

We ran the model again with a longer time period (40 years instead of 20 years) and with a Weertman friction law to investigate the sensitivity of the results to these choices. The results can be found Figures 1 and 2 in this document. We found that the sensitivity of our results to the length of the transient simulation and friction law are qualitatively similar, suggesting that the areas highlighted here are strong features. Extending the length of the transient simulation multiplies the gradient of sensitivities accordingly (i.e. doubling the simulation time leads to a doubling of the sensitivity) but the sensitivity patterns remain quantitatively similar to a shorter transient simulation. This was also found in Morlighem et al., 2021 whom stated "The consistency of these sensitivities across different models demonstrates that our conclusions are related to the physics of the system, and not due to specific modeling approaches or model parameters." These results will be included in the appendix of the revised manuscript. The 40 year simulation results for the Budd linear sliding law will be used within the final manuscript results section and discussion. In addition, an additional paragraph will be included at the end of the discussion: " Our model relies on a Budd linear sliding law, in which basal drag is directly proportional to sliding velocity. This friction law may not be valid under some sectors of our model domain such as the Siple Coast. We performed additional experiments to test the sensitivity of our results to the friction law and length of transient simulation (Figures A3 and A4 in the Appendix) by using a Weertman friction law instead. We found similar conclusions to Morlighem et al., 2021 with the Weertman friction law showing quantitatively similar results with the Budd sliding law suggesting that the areas highlighted in the sensitivity maps are robust features. Extending the length of the transient simulation increases the sensitivities accordingly (i.e. doubling the simulation time will double the sensitivity) but the sensitivity patterns remain quantitatively similar to the 20 year simulation. These results suggest that the conclusions drawn from the sensitivity maps are reliable and related to the physics of the system not the model parameters Morlighem et al., 2021." In addition, the length of the simulation (i.e. 40 years) will be emphasised in the results, discussion and conclusion as suggested by reviewer.

- I guess that the method is also sensitive to the values of the initial parameters. The problem you solve is ill-posed by nature, which is a common problem in glaciology. During the inversion process, an underestimation of the friction can be compensated by a higher ice rigidity. How does it affect the sensitivity analysis?

The inversion results for ice rigidity and basal friction will be included in the appendix of the final manuscript (Figure 3 in this document). Morlighem et al., 2021 showed that the sensitivity maps are not significantly dependent on the initial parameters: ISSM and STREAMICE produced the the same sensitivities (in Amundsen Sea Embayment) even though each model used different stress balance equations, meshes, discretization methods and initialization procedures. As stated in Morlighem et al., 2021: "The agreement

between the sensitivity maps produced by the two ice-sheet models that are completely independent indicates the robustness of the results.”

- Figure 6: What is the cause of the high spikes downstream the grounding line? For SMB, this is a bit counter-intuitive given the conclusion of the sensitivity of the model to SMB changes on the ice shelf.

The high spikes found in Figure 6 are most likely numerical artefacts due to our numerical model’s treatment of the grounding line following a sub-element grid scheme (i.e. subelement parameterization). Morlighem et al 2021 also observed that ISSM shows a strong sensitivity to melt at the grounding line, when theory shows that the sensitivity should be zero. They suggested that any sensitivity within 1-element of the grounding line should be interpreted with caution. This will be added to our results: “The high spikes observed in Figure 6 downstream of the grounding lines are numerical artefacts and should be interpreted with caution [Morlighem et al., 2021]. These numerical artefacts are likely due to the sub-element parameterization used within the numerical model’s treatment of the grounding line.”

- While containing interesting ideas and developments (especially the numerous relations with other studies), the discussion would benefit from more structure. At the moment, ideas are a bit scattered and it is difficult to follow everything and have a proper appreciation of the results. You start with a discussion on the effect of friction, then ice rigidity before switching to SMB and basal melt rate, to come back to basal friction and rigidity. Please consider reorganizing the discussion.

The discussion will be restructured and hopefully the reviewer agrees that the ideas are less scattered. The discussion will be structured (numbers relate to new paragraphs) like this: 1) Basal friction: Siple Coast Ice Streams, 2) Ice Rigidity: Siple Coast Ice Streams, 3) Basal friction and Ice rigidity: Byrd Glacier, 4) Basal friction and Ice rigidity: Pinning points, 5) SMB for model domain, 6) Basal melt: Siple Coast Ice Streams, 7) Basal melt: Byrd Glacier, 8) Basal melt: Pinning points, 9) Basal melt: Calving front.

- Lines 155-165: Could you explain what is the difference between the grounding zones of the Bindschadler and MacAyeal Ice Streams and the grounding line of the Whillans Ice Stream? A few lines after, you talk about grounding line for the three ice streams.

This is a good point and we misused the term “grounding zone”. This will be clarified and reworded in Lines 111-112: ”in the vicinity of the grounding line”. In addition, throughout the manuscript grounding zones will be removed, clarified and reworded using the above sentence and ”grounding line”.

- Line 161: “This stiffer till at the grounding line thickens the ice and stabilizes the position of the grounding line”. This statement is a bit misleading. If I understand correctly the mechanism, please consider adding something like “the stiffer till creates more basal drag and therefore a slowdown of the ice, leading to an ice thickening” or something similar.

This sentence will be reworded accordingly so the statement is no longer misleading. "The stiffer till at the grounding line creates more basal drag and consequently a slowdown of ice, leading to an thickening of ice which stabilizes the position of the grounding line."

- The conclusion is an example of an extensive used of conjunction adverbs: however, finally, therefore, thus. I think that in general, you could delete some of these conjunctions. It could also be broken down in two paragraphs.

Finally and therefore will be deleted as well as the conclusion being split into two paragraphs.

- Similarly, "Additionally", "in addition" or "therefore" is sometimes used twice in the same paragraph.

The repetitive use of "Additionally", "in addition" or "therefore" will be removed or replaced throughout the manuscript.

## 1.2 Technical Comments

- Line 9-11: I found this sentence very long and maybe containing unnecessary details for an abstract. It also seems to me that it lacks a verb (?). Could you reformulate it? Maybe consider only mentioning "pinning points, larger islands, and the shear margins" instead of naming all the places.

The sentence will be reworded: "With changes in basal melting close to the grounding lines of the Siple Coast Ice Streams and Transantarctic Mountains Outlet Glaciers having a larger impact on the final VAF compared to elsewhere. Additionally, the pinning points and ice shelf shear margins are highly sensitive to changes in basal melt."

- Line 23: consider changing "[...] has been through ocean-forced basal melting" to "[...] has occurred through ocean-forced basal melting"

This will be done.

- Line 30: I understand your statement about the sea level rise potential but I think that this sentence is not very clear, consider: "These catchments, almost entirely buttressed by RIS, represent a total potential sea level rise contribution of 11.6 m".

This will be done.

- Line 44: maybe change "at Ross Island" for "close to Ross Island" (Ross Island being the grounded ice).

This will be done.

- Line 49: In Stewart et al. (2019), this statement is more of an outlook, as their work focuses on in-situ observations close to Ross Island. I might be wrong here but I don't think that Schodlok et al. (2016) made projections, as they focus on the comparison between observations and simulations (past and present). You might want to cite papers about projections of future basal melt rates.

Appropriate references will be added and sentence reworded: "Summer sea-ice concentrations in the Ross Sea are projected to decrease by 56% by 2050 [Smith Jr. et al., 2014] with this ice-free period also expected to increase [Dinniman et al., 2018] which will highly likely increase ice-shelf basal melting impacting the future stability of the RIS [Stewart et al., 2019]."

- Line 57: I think you should use a comparative (larger) and not a superlative (largest).

This will be done.

- Line 66: delete "here".

This will be done.

- Line 68: Could you precise what temperature field you have used? Maybe also add which sub-element scheme you used (as you mention it).

These sentences will be added to methods: "We use the ISSM Ice Sheet Model Intercomparison Project for CMIP6 (ISMIP6) temperature field to initialize the ice viscosity over floating ice." In addition, the sub-element scheme used will be added (i.e. Sub element Parameterization 1).

- Line 85: I am not sure to understand here. I think you mean that a 20-year forward simulation (forced by SMB and basal melt rates outputs) IS used in the AD package (instead of ARE, which would refer to the forcings).

This sentence will be clarified.

- Line 89: Please be more specific than "overall ice viscosity".

This will be done.

- Figure 2: It might be interesting to use a logscale colorbar here. Right now it is relatively hard to make the distinction between the higher values (dark blue) and lower (but non-null) values (light blue). Could you also use non-italic font for the units?

We explored using a logscale colorbar here however decided against it. The logscale bar did not make the distinction clearer and resulted in Figure 2b (i.e. Ice Rigidity) distinctions being less clear. In addition, Morlighem et al 2021 does not use a logscale bar for these results and thus enables better comparison. The font for the units will be changed to non-italics.

- Line 106: change “[...] sensitivity of the model with respect to [...]” for “[...] sensitivity of the model to the basal friction [...]”

This will be done.

- Line 107: delete “vast”

This will be done.

- Line 113: “Increases” instead of “increase”

This will be done.

- Line 119: add a comma between “[...] ice rigidity” and “highlighting [...]”

This will be done.

- Line 125: add a comma between “[...] over 20 years” and “therefore [...]”

This will be done.

- Line 132: What do you mean by “grounding zones of the Siple Coast Ice Streams”? To me the maximum sensitivity is much more inland, as you mentioned it before. Are you talking about the grounding zone as the surrounding of the grounding line? In this case, it does not look like the region with the highest sensitivity (maybe change the color bar so that it is visible in your Figure).

The term “grounding zones” will be removed and clarification will be added to Line 132 and the color bar will be changed in Figure 5(a).

- Figure 5(a) is largely saturated, could you use a different color scale. Maybe with more than one color?

A different color scale will be used on Figure 5(a). Figure 4 in this document show the changes that will be made.

- Line 135: This statement is a bit misleading. The pinning points are very sensitive to SMB changes because they are part of the VAF. You already mentioned this for the grounded ice. You might delete this statement or put it after the statement “This is expected since floating ice does not contribute directly to VAF”.

This will be put after the statement: “This is expected since floating ice does not contribute directly to VAF”.

- Line 149: Delete the parenthesis “(i.e., red outline in 5 showing the ‘passive’ ice region)”. Passive ice has not been introduced yet in the text.

This will be done.

- Line 163: To me, it is the softening of the till that leads to a basal friction change (as perceived by the model) and not the opposite. You might consider rephrasing this sentence the other way.

This will be done.

- Line 165: consider a new paragraph here, as you transition from a focus on the basal drag to a focus on the ice rigidity.

Discussion will be restructured with separate paragraphs for basal drag and ice rigidity changes.

- Line 165: similarly, here I think you should talk about “basal friction” instead of “till conditions”.

This will be done.

- Line 168: “Therefore, changes in ice rigidity at the grounding zones of the Siple Coast Ice Streams changes affect the ice flow and the discharge rates, which impacts the overall mass balance of the RIS domain, as shown by our results.” This sentence clearly lacks punctuation (see my attempt of correction).

The wording of the sentence will be changed: “Therefore, our results show that changes in ice rigidity at the grounding lines of the Siple Coast Ice Streams affect the ice flow and discharge rates impacting the overall mass balance of the RIS domain.”

- Line 182: I think that your results show the opposite. In Figure 4, Bind-schadler Ice Stream shows a high sensitivity to basal friction in the center of the stream. The high sensitivity at the margins is observed for the ice rigidity, or is there a mistake in the Figure labelling?

There is no mistake in labelling of the figure. We were commenting on the small spikes in sensitivity in the Bind-schadler Ice Stream margins to basal friction that we can see in Figure 4. We will reword the sentence on Line 182 from “highly sensitive” to “sensitive”.

- Line 193: This is where, I think, you need another color scale on Figure 5.

This will be done.

- Line 197: It is only now that I really understand your statement at line 132. I think you need to be clearer at line 132 when talking about the high sensitivity of the grounding zone.

The phrase “grounding zones” will be removed and clarified/reworded throughout the manuscript.

- Line 200: I am not sure that “promote ice thickness” is really what you want to say, maybe only “modify” or “affect”. For example: “[...] would affect ice thickness and discharge on the RIS”

This will be changed from “promote” to “affect”.

- Line 206: Maybe I am misunderstanding but the effect of the ocean heat on the ice temperature and the rate of basal melting is not really accounted for in the model, right? You apply the melt as a forcing with no feedback. It would be nice to specify this here.

An extra sentence will be added at Line 206: "Basal melt is applied as a forcing with no feedback in the numerical model resulting in the sensitivity maps not taking into account the effect of ocean heat or rate of basal melting."

- Line 212: would have greatest impact (compared to what?) on the final VAF if what? If basal melting was increasing in the future?

We will reword Line 212: "This highlights that changes in basal melting are currently occurring in sensitive areas that have the greatest impact on the final VAF compared to elsewhere."

- Line 265: You write: "These results show that the RIS mass balance is highly sensitive to changes in ocean circulation and mixing as well as tidal currents which could potentially drive changes in basal melt rates at the calving front at the grounding zones." I guess you mean "at the calving front AND at the grounding zones"?

This will be changed.

- Line 268: I would delete the end of the sentence "as this study identifies that these regions are important for the mass balance of the RIS" as you already explained these two sentences earlier.

This will be done.

-Line 269: I agree with you. Such modeling can be useful to plan field campaigns. We do not use enough this kind of tool.

Exactly! Thanks for your comments.

## 2 Reviewer #2

The method used by the authors is sensible, the results are well presented and well discussed, and the conclusions are supported by the results presented. This paper describes the application of an existing technique to a new area of the ice sheet, and thus represents a solid incremental advance in our understanding of the Antarctic Ice Sheet. This paper deserves to be published in *The Cryosphere*. However, before publication, I have some concerns that I would like to see addressed around the analysis of basal drag. I describe these concerns next, and then move on to more minor comments. Overall, my concerns can be addressed with additional figures (or additional subplots in the existing figures) and a bit more analysis.

We would like to thank reviewer for their constructive review and excellent suggestions which have improved the manuscript.



## 2.1 Major Comments

-My biggest concern with this paper is with the use of a linear sliding law, in which basal drag is directly proportional to sliding velocity. Simply put, a linear sliding law is not a realistic or physically defensible representation of dynamics at the ice base. Even in areas of the ice sheet underlain by hard bedrock, the sliding relationship is expected to be multi-valued with a maximum basal drag given by Iken's bound (Iken, 1981; Schoof, 2005; Gagliardini et al., 2007), a relationship which is quite different from a linear one (especially for fast sliding, like the ice streams where the authors found high sensitivity). Moreover, the Siple Coast ice streams, where the authors find the highest sensitivity to basal drag, are known to be underlain not by hard bedrock but by soft subglacial till that obeys a Coulomb plastic friction law (Tulaczyk et al., 2000). The linear sliding rule used by the authors corresponds to power-law sliding with an exponent equal to one, while a more realistic Coulomb plastic sliding law corresponds to the limit where the exponent approaches infinity. Thus, the sliding law used in this paper is the exact opposite of a realistic one for the region of interest. Therefore, it is critical that the authors present results that are robust to the choice of sliding law. My recommendation is that authors show maps of the sensitivity of VAF to basal drag alongside their maps of sensitivity to drag coefficient. This quantity, the sensitivity of ice sheet mass balance to changes in basal drag, is likely to be far more representative of the soft sediments that compose the true ice sheet bed than the sensitivity to drag coefficient. A map showing this quantity should be added to figure 2, and this quantity should also replace the sensitivity to drag coefficient in the top rows of figures 3 and 4.

Firstly, we would like to thank the reviewer for their extremely useful comments regarding the sliding law used and the time they spent on this issue. The reviewer is recommending this due to their concern regarding the use of the Budd linear sliding law. Therefore, we decided to rerun the simulations using the Weertman Friction Law. Morlighem et al 2021 also compared the Budd linear sliding law with the Weertman Friction law and found similar results for their location of interest. The sensitivity maps for the Weertman Friction law will be included in the Appendix of the final manuscript (Figures 1 and 2 in this document). We can see that the sensitivity of our results to the friction law are qualitatively similar, suggesting that the areas highlighted are robust and reliable features. The largest differences are found in the ice rigidity and basal friction spatial distributions with the Weertman sliding law displaying larger sensitivities to ice rigidity (especially along ice the ice stream shear margins) and smaller sensitives to basal friction (especially within the main ice trunks). However, these sensitives are marginally different to the Budd sliding law and display similar spatial patterns highlighting that these identified sensitive regions are strong features that need to be monitored in the future. Therefore, we continue to use the sensitivity to drag coefficient in the manuscript as analysis of the AD results as we have shown that the use of the Budd linear sliding law is robust for the model sensitivity.

- In addition, it might also be interesting to look at maps of the sensitivity to normalized perturbations in basal drag, beyond merely the sensitivity to drag perturbations. That is to say, it might be interesting to look at the sensitivity to  $d\tau/\tau$ , rather than merely  $d\tau$ . That is because there is a very large range in basal drag within the domain: within the very low-friction ice plains in the downstream regions of the Siple Coast ice streams, an increase in  $\tau$  by a few kPa could easily represent a doubling of the local basal drag, whereas in other regions that same perturbation might be an increase of only a few percent. However, I view the sensitivity to relative drag perturbations to be less important than basic sensitivity to drag perturbations. If the authors want to omit the sensitivity to relative drag perturbations, that is fine. It is only important that the sensitivity analysis be done with respect to drag, rather than drag coefficient, to ensure that the results of this study are robust to the choice of sliding law. Of course, I do not expect the results to be hugely different. It is likely that the map of sensitivity to drag will be similar in spatial structure to the map of sensitivity to drag coefficient, so the authors probably will not need to change their conclusions or rewrite much of the manuscript. However, until the map is actually made, we cannot know for sure. An analysis of the sensitivity of the model to basal drag will be much more physically defensible and more robust to changes in sliding law than an analysis of the sensitivity of the model to the coefficient of a linear sliding law.

This is an interesting idea but we ultimately decided not to plot the normalized sensitivities and to show the results of another friction law instead. We decided to do this as we feel that including the normalized sensitivities would not have added significant value to the discussion and may cause confusion for the readers regarding which figures to use for identifying areas of sensitivity and concern for future field campaigns. The normalised basal friction sensitivities can be found in Figure 4 for the Budd linear sliding law.

## 2.2 Other Comments

- L29-30: “Through the ice shelf restraining this ice in the catchment, it has a total potential contribution to sea level rise of 11.6 m (Tinto et al., 2019).” This is very awkwardly worded. Perhaps rephrase to something like, “The grounded ice in its catchment has the potential to raise sea level by up to 11.6 m (Tinto et al., 2019).”

We will rephrase to: “These catchments, almost entirely buttressed by RIS, represent a total potential sea level rise contribution of 11.6m.”

- Figure 1 - Perhaps it would be better to show velocity with a logarithmic color scale? Velocity varies by several orders of magnitude over the ice sheet. Presenting it on a linear scale as in this figure has the effect of emphasizing fast-flowing areas, especially the ice shelf. Perhaps this was the intention; however, a side effect of this is that the structure of ice streams in the grounded part of

the domain is faded and difficult to see in many places. In addition, it would be helpful to show some aspects of the ice sheet geometry in additional plots of Figure 1, such as the bed elevation, ice thickness, or surface slope.

A logarithmic color scale was decided not to be added. Instead, we will change the colour scale of Figure 1 to highlight the ice streams more clearly. In addition, it is important to highlight that the front of the ice shelf is dynamic (i.e high velocity rates) in relation to the discussion in this paper about 'passive' part of the ice shelf. However, an additional figure will be added to Figure 1 to show the ice surface thickness (in m) to provide more context regarding the ice sheet geometry. These changes can be found in Figure 5 of this document.

- L68: "...ice viscosity depending on the ice temperature..." Where do you get the ice temperature from?

These sentences will be added to methods: "We use the ice temperature from ISSM's submission to the Ice Sheet Model Intercomparison Project for CMIP6 (ISMIP6) to initialize the ice viscosity over floating ice."

- L72-83: Model setup: What does your inverted drag coefficient look like? What about the other forcing fields? It would be useful to have a figure showing maps of the background fields used to force the model, so that we can put the sensitivity maps in context. I would be interested in seeing a figure that showed the inverted basal drag coefficient, the actual basal drag, the ice rigidity, surface mass balance, and basal mass balance. Without being able to see these fields, it is hard to put the sensitivity maps in context. Remember, the quantity being computed by the AD procedure is the linear sensitivity- that is, the derivative of the output quantity with respect to small perturbations in the input quantity, evaluated at the given value of the input quantity. If the background ice sheet configuration changes, the sensitivity will change as well.

A figure showing the inverted basal drag coefficient, actual basal drag, the ice rigidity, surface mass balance and basal mass balance will be included in the Appendix of the final manuscript (Figures 3 and 6 in this document). We can see that for the basal drag coefficient and basal drag that the floating ice has low basal drag (as expected), while the grounded ice shows variations in basal drag especially at the Siple Coast Ice Streams grounding zones. We can also see high basal drag at the pinning points and shear zones (i.e Ross Island). For ice viscosity we see high viscosity values for the floating ice (as expected) which decreases towards the grounded ice. For the basal mass balance we observed high basal melt at the ice shelf calving front, in particular at Coulman High/Ross Island. Relatively high basal melting is also observed towards the grounding lines. Finally, SMB has relatively constant values on the grounded and floating ice with the ice shelf calving front, coastal areas and transantarctic mountains being the exception to this.

- L102: Equation 4, compared to Figures 2 and 5 This equation implies that you have the units wrong in the labels of Figures 2 and 5. In order to get from

the sensitivity to a parameter, and the perturbation in that parameter, to an estimate in the volume change, it is necessary to perform a spatial integral over the model domain, with differential. Thus, the sensitivities should have units of meters per (parameter units), rather than  $m^3$  per (parameter units), as you have given in the figure titles.

Thank you for pointing this out, we will change the units to units of meters per (parameter units).

- L107: “These sensitivity maps show that the vast majority of the grounded ice is not sensitive to changes in friction or rheology...” This wording isn’t quite right. Presumably, the local flow in the vast majority of the grounded ice is going to be sensitive to local changes in friction or rheology. What you mean here is what you explained in the rest of the sentence, namely, that the overall mass balance of the ice sheet (after 20 years) is not sensitive to local changes in friction or rheology in the vast majority of the grounded domain. Perhaps a better wording would be, “These maps show that the sensitivity to friction and rheology is low in the vast majority of the grounded domain...”

The sentence will be changed to: “These maps show that the sensitivity to friction and rheology is low in the majority of the grounded domain, which means that changing the basal friction or ice rigidity over the majority of the region would not significantly influence the overall mass balance over 20 years.”

- L118-120: “Kamb Ice Stream on the Siple Coast shows low to no sensitivity to changes in the basal friction or ice rigidity highlighting that the Kamb Ice Stream is currently stagnant and thus changing the friction or ice rigidity will not change the ice discharge significantly.” It is worth pointing out that this result is a byproduct of the assumptions inherent in a linear perturbation analysis, and thus this negative result for Kamb ice stream can potentially be misleading. The sensitivity maps produced by this method basically answer the question: ‘if we changed the friction coefficient at this particular location by an infinitesimal amount, what would be the marginal change in VAF?’ In the continuous limit, each perturbation would only be to a single point with vanishing area, while in the numerical implementation, the perturbation resides at a single mesh node. Thus, the method cannot capture the sensitivity of VAF to a general reactivation of Kamb ice stream, which would involve a spatially correlated large-amplitude reduction in basal friction across the entire bed of the former ice stream. Clearly, a general reactivation of Kamb ice stream would reduce the grounded volume of the ice sheet. However, a reduction in basal friction at one location within the former ice stream would not have much effect if friction remained high across the rest of Kamb. Thus, the result of a low sensitivity within Kamb Ice Stream is accurate within the assumptions of this method, but it can be misleading in the sense that this method doesn’t test for the possibility of spatially correlated perturbations to model parameters, and a general ice stream reactivation would be a spatially correlated perturbation. As I mentioned above, this method tests

the sensitivity of VAF to perturbations in the forcing parameters, assuming that the general ice sheet configuration does not change. The reactivation of a dormant ice stream is a big enough perturbation that it would constitute a change in the general ice sheet configuration.

Clarification will be added to L118-120: "Kamb Ice Stream on the Siple Coast shows low to no sensitivity to changes in the basal friction or ice rigidity, highlighting that the Kamb Ice Stream is currently stagnant and thus changing the friction or ice rigidity will not change the ice discharge significantly. The sensitivity map tests the sensitivity of the VAF to perturbations in the forcing parameters, assuming that the general ice sheet configuration does not change. Therefore, the sensitivity map is unable to capture the general reactivation of the Kamb Ice Stream as the reactivation of a dormant ice stream would be a large perturbation that would constitute a change in the general ice sheet configuration."

- Figure 3: Are the negative values in the bottom row (sensitivity to rheology B) real, or do these simply represent numerical artifacts? Put another way, do you actually believe that there are places where strengthening the ice will actually cause more of it to flow into the ocean? There are also some negative values in the top row of this figure and in figure 4, but those negative excursions are much smaller than the negative excursions in the bottom row of figure 3.

The high spikes found in Figure 3 and 4 are numerical artefacts as our numerical model's treatment of the grounding line follows a sub-element grid scheme (i.e. subelement parameterization). Morlighem et al 2021 also found this and suggested that any sensitivity within 1-element of the grounding line should be interpreted with caution. This will be added to our results.

- Figure 5, L127-149, L192-201: Sensitivity to SMB and discussion of sensitivity to SMB I would be very interested in seeing a map of the sensitivity to SMB normalized by the stagnant ice sensitivity- that is, the sensitivity that you would get assuming that the ice did not move and the perturbation to SMB simply piled up mass at the location of the perturbation. That "stagnant ice" sensitivity is simply given by the time period of the simulation, in this case 20 years (by the way, I believe that you have made an additional units error in Figure 5, beyond the units error I pointed out earlier: the sensitivities to surface and basal mass balance probably should have units of  $m/(m/s)$ , rather than  $m/(m/a)$  as you put in Figure 5, since otherwise values on the order of  $6-7 \times 10^8$  are far too large. However, if ISSM is producing sensitivities in terms of  $m/s$  instead of  $m/a$ , then those magnitudes are exactly what one would expect from the stagnant-ice sensitivity with a 20 year model runtime). Normalizing the SMB sensitivity by the stagnant-ice sensitivity should help to put the SMB sensitivity in context. If there are any areas with sensitivity greater than the stagnant-ice value, then you could say definitively that SMB is vital to keeping those areas grounded and buttressing the rest of the ice sheet. Areas below the stagnant-ice value probably reflect regions where ice flux evolves very quickly (within the 20 year runtime) to export additional mass.

We will change the sensitivity maps (Figure 5 in this document) to show sensitivities to surface and basal mass balance with units of  $m/(m/a)$ . Additionally, a 40 year transient simulation was ran to compare results with the 20 year transient simulation (Figure 1 of this document). These results were qualitatively similar suggesting that the areas highlighted in the sensitivity maps are robust. Extending the length of the transient simulation multiplies the gradient of sensitivities but the sensitivity patterns remain quantitatively similar to the short transient simulation. This was also found in Morlighem et al 2021. The 40 year transient simulation results will be included as the final results in the revised manuscript.

Sensitivity maps to SMB normalised to stagnant ice sensitivity are included in Figure 8 in this document. However, we do not think this figure should be included in the final manuscript as it does not bring additional value to the discussion and the readers may find it difficult to grasp. We think that the sensitivity maps already included in the manuscript are appropriate for this paper and allow reliable conclusions to be drawn. In addition, Morlighem et al 2021 also used the same sensitivity maps allowing comparison between these two model domains sensitivity maps. We feel this would be an unnecessary additional plot that would not provide substantial analysis or differing conclusions to be drawn regarding the sensitivity analysis of SMB forcing on the model domain. In particular normalising the SMB sensitivities to stagnant ice flow, we feel would not be appropriate to include as we are not looking at sensitivities in relation to ice flow dynamics. In addition, we have shown that extending the length of the transient simulation multiplies the gradient of sensitivities but the sensitivity patterns remain the same for the SMB forcing in the model domain. We also showed that using the Budd or Weertman sliding law produced similar sensitivities to SMB forcing in the model domain. Therefore, this additional plot would not be included in the final manuscript.

- L157-158: “Our results show that the Bindschadler and MacAyeal Ice Streams have high sensitivities to changes in basal friction at their grounding zones due to these ‘sticky spots’ being key in controlling the ice discharge” Do your results in fact show high sensitivity at the sticky spots, as opposed to high sensitivity in the ice plains generally? This is where it would be helpful to have a map of the inversion results to compare your sensitivity maps to. In addition, this is where it would be helpful to distinguish between the sensitivity to perturbations in drag and the sensitivity to relative perturbations in drag, as I discussed earlier.

We will add the inversion results and Weertman friction law sensitivity maps to the Appendix of the final manuscript (Figures 2 and 3 in this document). With closer inspection of these inversion results and comparison to the sensitivity maps we still suggest that the sticky spots play an important role in the ice discharge. Wording on L157-158 will be clarified and edited.

## References

- Dinniman, M. S., J. M. Klinck, E. E. Hofmann, and W. O. Smith, Effects of projected changes in wind, atmospheric temperature, and freshwater inflow on the ross sea, *Journal of Climate*, *31*(4), 1619 – 1635, doi:10.1175/JCLI-D-17-0351.1, 2018.
- Morlighem, M., D. Goldberg, T. Dias dos Santos, J. Lee, and M. Sagebaum, Mapping the sensitivity of the amundsen sea embayment to changes in external forcings using automatic differentiation, *Geophysical Research Letters*, *48*(23), e2021GL095440, doi:https://doi.org/10.1029/2021GL095440, e2021GL095440 2021GL095440, 2021.
- Smith Jr., W. O., M. S. Dinniman, E. E. Hofmann, and J. M. Klinck, The effects of changing winds and temperatures on the oceanography of the ross sea in the 21st century, *Geophysical Research Letters*, *41*(5), 1624–1631, doi: https://doi.org/10.1002/2014GL059311, 2014.
- Stewart, C. L., P. Christoffersen, K. W. Nicholls, M. J. Williams, and J. A. Dowdeswell, Basal melting of Ross Ice Shelf from solar heat absorption in an ice-front polynya, *Nature Geoscience*, *12*(6), 435–440, doi:10.1038/s41561-019-0356-0, 2019.

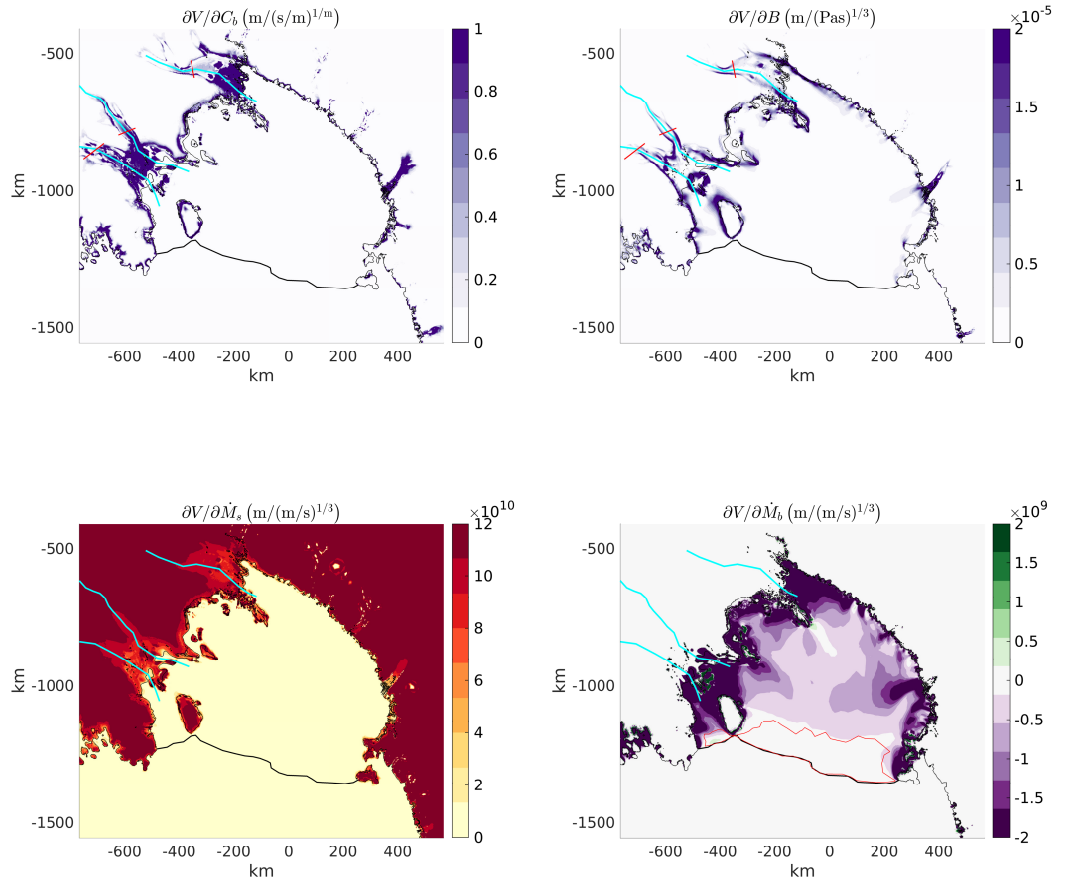

Figure 1: Sensitivity maps of final volume above flotation to the basal friction coefficient  $C_b$  (left) and ice rigidity  $B$  (right) over 40 years using the Budd linear sliding law are shown in the top row of the figure. The blue lines highlight the tracks for the along-flow profiles and the red lines the across-flow profiles. Sensitivity maps of final volume above flotation to the surface mass balance  $\dot{M}_s$  (left) and basal melting  $\dot{M}_b$  (right) over 40 years using the Budd linear sliding law are shown in the bottom row of the figure.



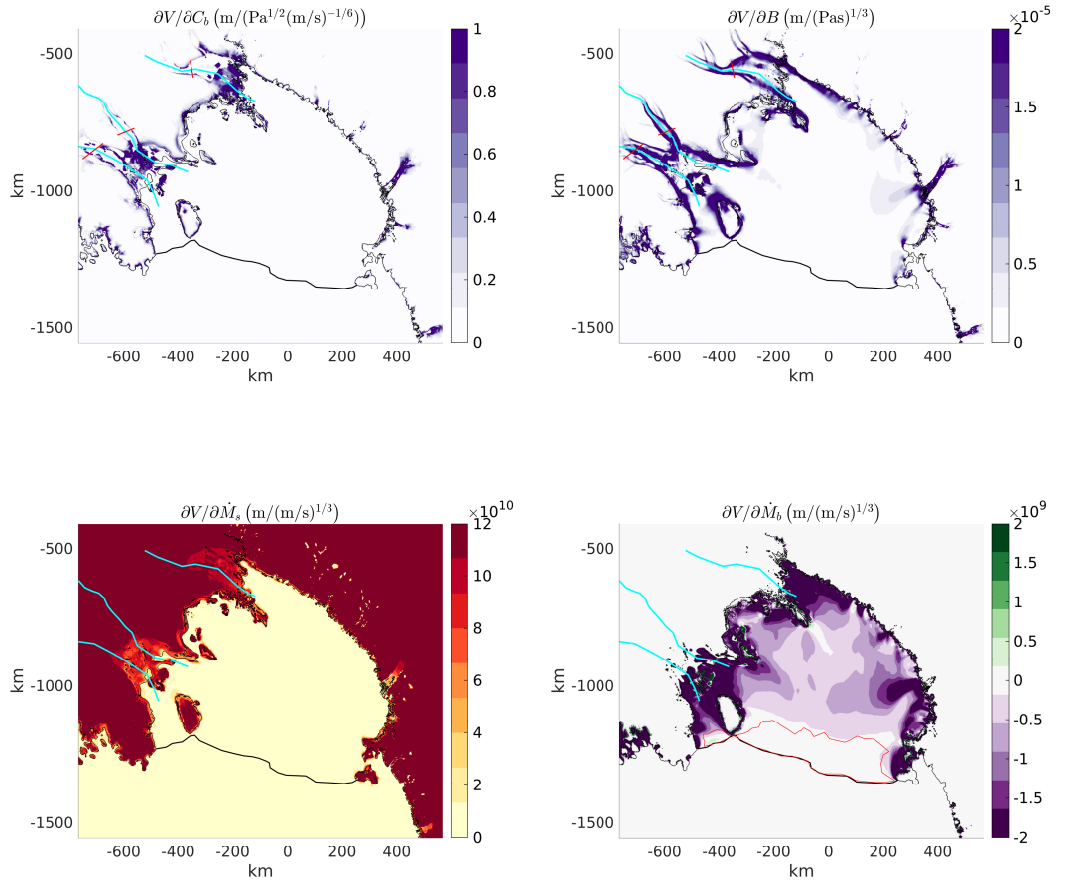

Figure 2: Sensitivity maps of final volume above flotation to the basal friction coefficient  $C_b$  (left) and ice rigidity  $B$  (right) over 40 years using the Weertman sliding law are shown in the top row of the figure. The blue lines highlight the tracks for the along-flow profiles and the red lines the across-flow profiles. Sensitivity maps of final volume above flotation to the surface mass balance  $\dot{M}_s$  (left) and basal melting  $\dot{M}_b$  (right) over 40 years using the Weertman sliding law are shown in the bottom row of the figure.

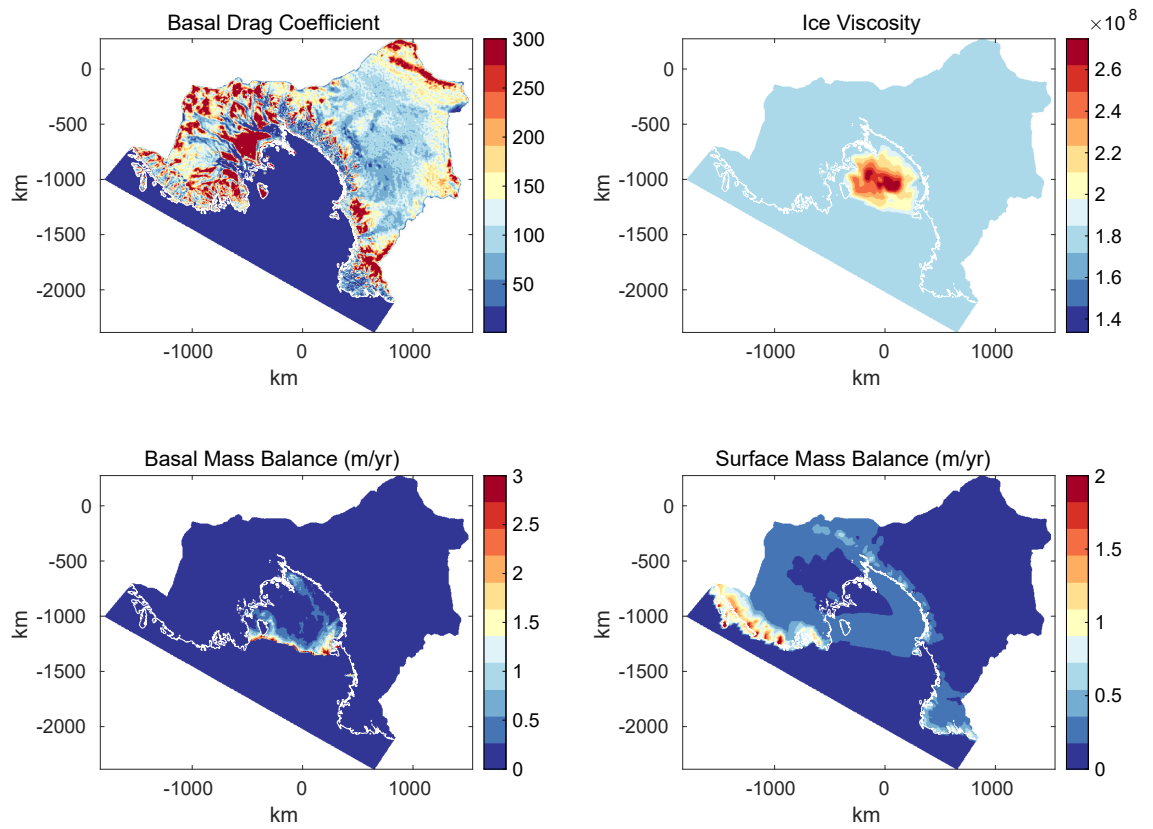

Figure 3: Inversions and background fields used to force the model: inverted basal friction coefficient, inverted ice viscosity, basal mass balance and surface mass balance.

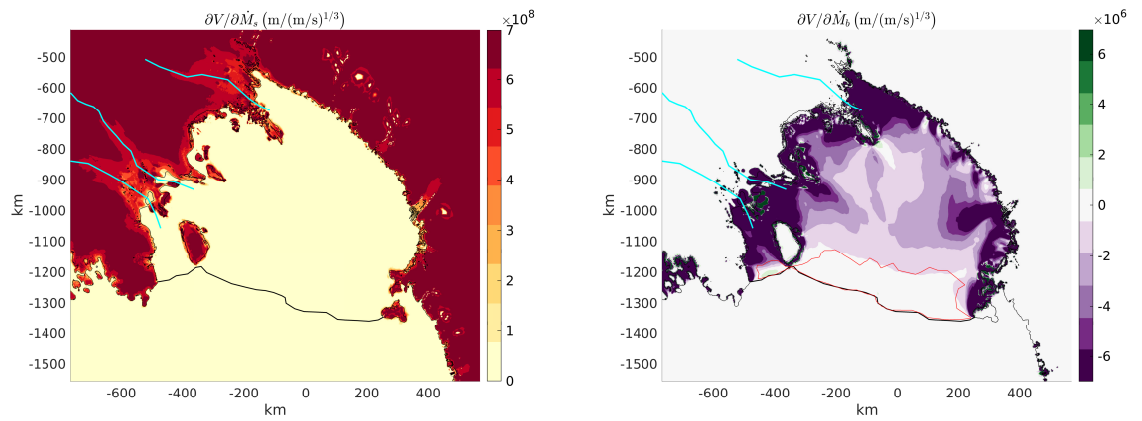

Figure 4: Sensitivity maps of final volume above flotation to the surface mass balance  $\dot{M}_s$  (left) and basal melting  $\dot{M}_b$  (right) over 20 years.

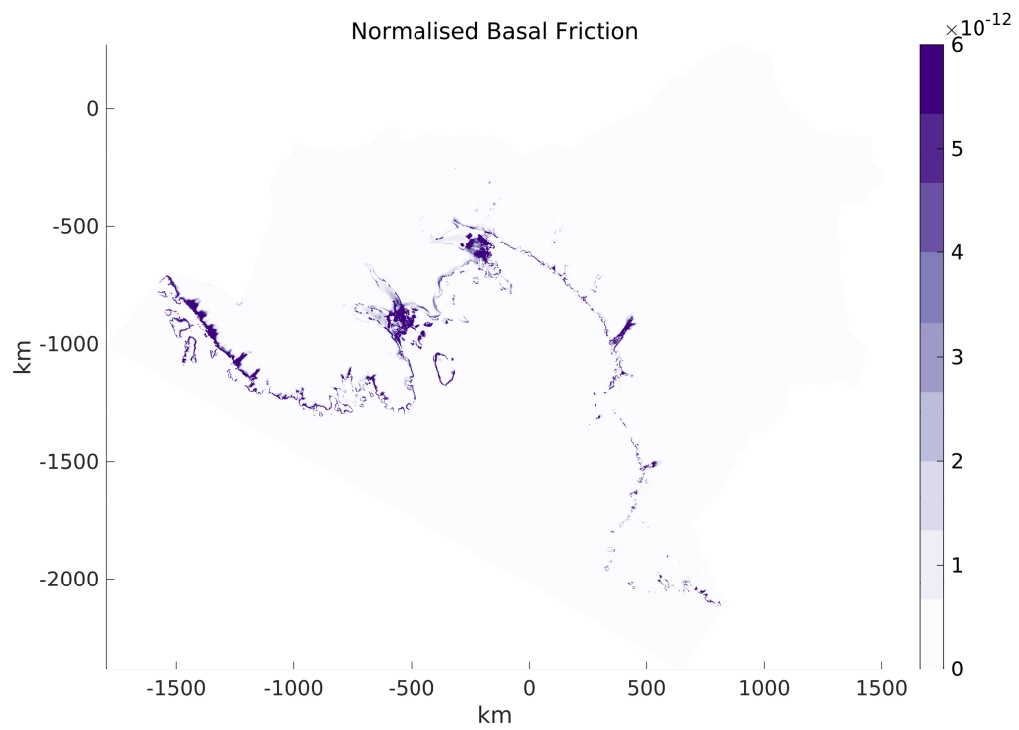

Figure 5: The normalised basal friction coefficient sensitivities are shown for the Budd linear sliding law over 20 years.

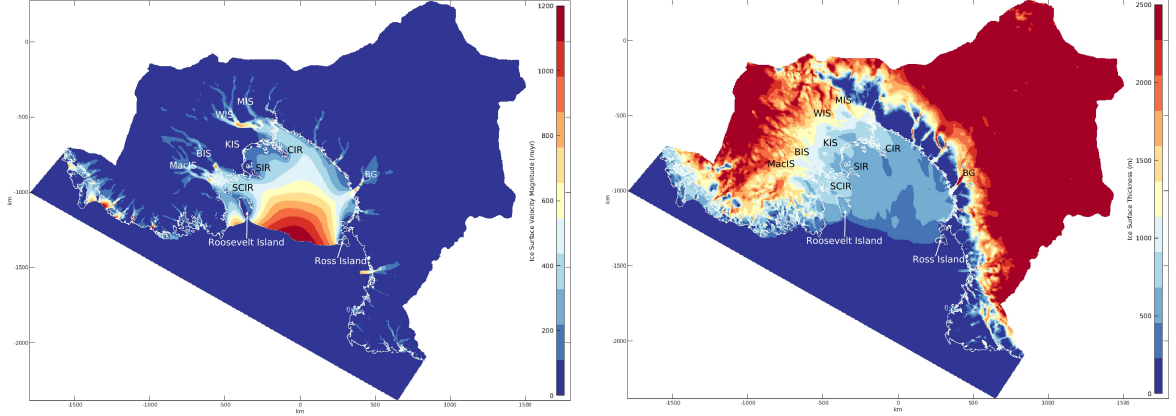

Figure 6: Modelled Ross Ice Shelf surface velocities and ice surface thickness after initialisation. The grounding line is marked in white. Locations discussed in this paper are labelled. These include the Siple Coast Ice Streams: Mercer Ice Stream (MIS), Whillans Ice Stream (WIS), Kamb Ice Stream (KIS), Bindshadler Ice Stream (BIS) and MacAyeal Ice Stream (MacIS). Byrd Glacier (BG) and Ross Island are also labelled. In addition, the ice rises are labeled on the Siple Coast: CIR = Crary Ice Rise, SIR = Steershead Ice Rise, SCIR = Shirase Coast Ice Rumples and Roosevelt Island.

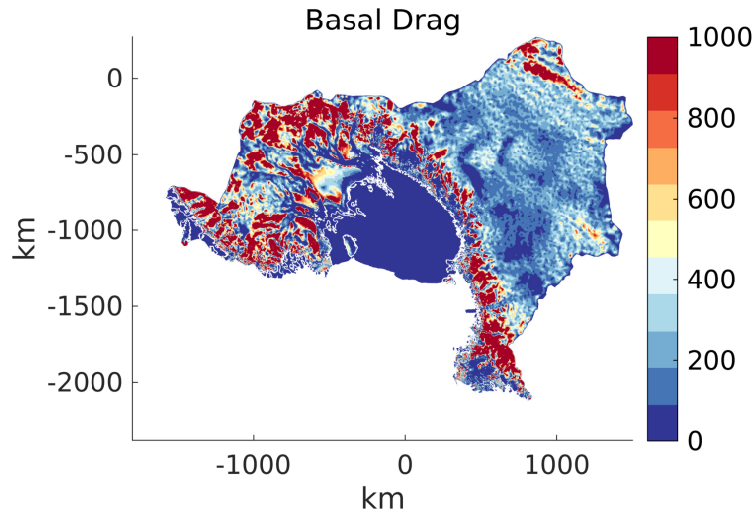

Figure 7: Inverted basal drag.

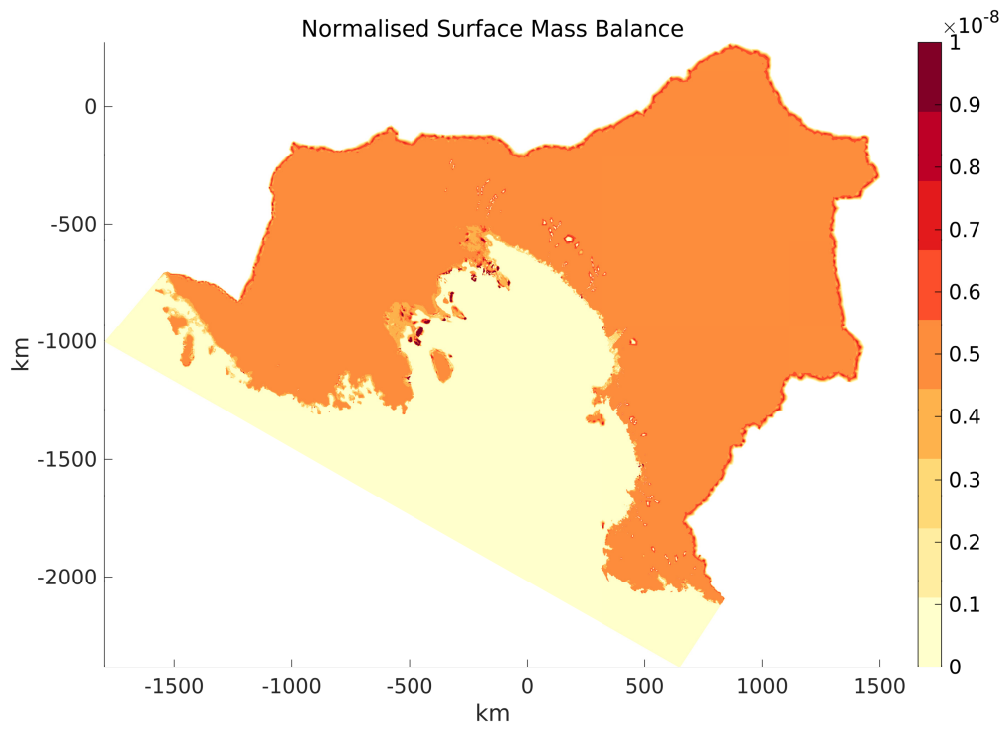

Figure 8: The normalised surface mass balance sensitivities are shown for the Budd linear sliding law over 20 years.
